1 **Prevalence and risk factors of neurodevelopmental disorders among migrant and refugee**  
2 **preschool children in high-income countries: A systematic review and meta-analysis**  
3 **protocol**

4 Kh Shafiur Rahaman<sup>1, 2, 3\*</sup>, Valsamma Eapen<sup>4,5,6</sup>, Mythily Subramaniam<sup>7,8,9</sup>, James Rufus  
5 John<sup>4,5,6</sup>, Kanchana Ekanayake<sup>10</sup>, Amit Arora<sup>1, 2, 11, 12, 13</sup>

6 1. School of Health Sciences, Western Sydney University, Campbelltown Campus,  
7 Locked Bag 1797, Penrith, NSW 2751, Australia

8 2. Health Equity Laboratory, Campbelltown, NSW 2560, Australia

9 3. Bangladesh Academy of Dietetics and Nutrition (BADN), Dhaka, Bangladesh

10 4. School of Clinical Medicine, UNSW Australia, Liverpool, NSW 2170

11 5. Ingham Institute of Applied Medical Research, Liverpool, NSW, Australia

12 6. South Western Sydney Local Health District, Liverpool, NSW, Australia

13 7. Research Division, Institute of Mental Health, Singapore 539747

14 8. Saw Swee Hock School of Public Health, National University of Singapore, Singapore  
15 117549

16 9. Lee Kong Chian School of Medicine, Nanyang Technological University

17 10. University of Sydney Library, Camperdown, NSW, 2006, Australia.

18 11. Translational Health Research Institute, Western Sydney University, Locked Bag  
19 1797, Penrith, NSW 2751, Australia

20 12. Discipline of Child and Adolescent Health, Sydney Medical School, Faculty of  
21 Medicine and Health, The University of Sydney, Westmead, NSW 2145, Australia

22 13. Oral Health Services, Sydney Local Health District and Sydney Dental Hospital, NSW  
23 Health, Surry Hills, NSW 2010, Australia

24 \* Correspondence: [22108248@student.westernsydney.edu.au](mailto:22108248@student.westernsydney.edu.au)

25

26

27

28

29

30

31

## 32 Abstract

33 Neurodevelopment is a complicated mechanism involving genetic, cognitive, emotional, and  
34 behavioural processes. Factors related to parental migration directly or indirectly affect their  
35 children's neurodevelopmental process and may lead to Neurodevelopmental Disorders  
36 (NDDs). Other factors such as barriers to accessing health services, social discrimination,  
37 mother's psychosocial health during pregnancy may disrupt the neurodevelopmental process  
38 and lead to disorders and disabilities among children of migrants. However, there is a gap in  
39 data on the prevalence and the risk factors of neurodevelopmental disorders among migrant  
40 children have been inadequately listed. This paper presents a protocol for a systematic review  
41 to study and synthesise published evidence to ascertain the global prevalence of  
42 Neurodevelopment disorders and risk factors leading to those groups of neurodevelopment  
43 disorders among children of migrants in high-income countries. The protocol of this systematic  
44 review was developed with guidance from the Joanna Briggs Institute (JBI) methodology and  
45 reported as per the Preferred Reporting Items for Systematic Review and Meta-Analysis  
46 Protocols (PRISMA-P) statement. Observational studies that report on the prevalence and risk  
47 factors of neurodevelopment disorders among migrant young children under 5 years of age in  
48 high-income countries will be included in this study. Four electronic databases will be searched  
49 comprehensively (MEDLINE (Ovid), EMBASE (Ovid), CINAHL, PsycINFO, and Scopus).  
50 Two reviewers will independently screen, select studies, assess the methodological quality, and  
51 extract all relevant data subsequently. The systematic review and meta-analysis will help  
52 design tailored interventions for migrant children with and identify gaps from previous research  
53 to guide future research. This review is registered with PROSPERO (CRD42024589357).

54

55

56

57

58

59

60

61

62 **Keywords:** Prevalence; Risk; Neurodevelopment Disorders; NDDs; migrant; refugee; high-  
63 income countries; systematic review

## 64 **1. Introduction**

65 Neurodevelopmental disorders involve a group of conditions that start in the development  
66 phase of a child and disrupt the individual, socioeconomic, academic, and occupational  
67 functioning [1]. Neurodevelopmental Disorders broadly include intellectual disorders, autistic  
68 spectrum disorders (ASD), attention deficit hyperactivity disorders (ADHD), language and  
69 learning disorders, motor disorders, etc. [1]. Both genetic and environmental factors contribute  
70 to the development of these disorders [2], leading to impairments in motor, cognitive, language,  
71 and behavioural [3]. Globally, 316.8 million cases of developmental conditions have been  
72 reported, with males being affected more than females [3]. The prevalence of  
73 neurodevelopmental disorders among children aged between 0 to 18 years differs across  
74 different population groups. A recent systematic review reported a significant variation in the  
75 prevalence of neurodevelopmental disorders (4.7% to 88.5%) [4]. The prevalence of  
76 Neurodevelopment disorders in high-income countries was estimated between 7.0% to 15.0%  
77 of children in the general population [5, 6]. In contrast, the prevalence in low-middle countries  
78 has been reported to be 7.6% [7], and children from low-economic settings are asymmetrically  
79 affected by neurodevelopmental disorders [8].

80 Various risk factors of neurodevelopmental disorders have been reported in the literature,  
81 which include genetic, environmental, prenatal and postnatal issues, nutritional disorders,  
82 exposure to crisis, trauma, and poverty [9]. Furthermore, some children are more likely than  
83 others to develop developmental disabilities because of multiple unfavourable circumstances  
84 at different levels which include but are not limited to the family's socioeconomic standing,  
85 their nationality, and their racial and ethnic heritage [3]. A recent review reported that children  
86 from migrant and refugee families coming from low and middle-income countries have a  
87 higher risk of neurodevelopmental disorders [10]. Children with one or both migrant parent(s)  
88 were found to have an increased risk of neurodevelopmental disorders related to language,  
89 academic skills, or coordination [11, 12].

90 The risk factors related to neurodevelopmental delays in children may vary based on parents'  
91 ethnic background and circumstances during the migration [13, 14]. Other difficulties related  
92 to stigma [15], inadequate knowledge, differences in perception [16], referral patterns [17], and  
93 delayed diagnosis [18] also contribute to the risk of neurodevelopmental disorders among  
94 children with parental history of migration and ethnic minority. Migrants often exhibit risk  
95 factors such as inappropriate residence, inadequate nutrition (e.g., obesity) [19, 20], and low

96 socioeconomic conditions [21], which are different from the host population. Maternal mental  
97 health is another risk factor for neurodevelopmental disorders. Some migrant mothers also  
98 would have experienced war and political conflict or extreme economic crises in their home  
99 country. Some mothers may have been exposed to poverty and sexual violence, which caused  
100 high mental stress during their pregnancy [22]. Health literacy among migrant families varies,  
101 as do the developmental outcomes of children. Additionally, cultural sensitivity and the  
102 capacity of health services in the host country to identify and treat developmental disabilities  
103 and impairments can differ significantly.

104 Available data on the prevalence and incidence rates of neurodevelopmental disorders are  
105 necessary to plan for the sustainable delivery of health, social and education services. However,  
106 data is often available only for the mainstream population, with only a few studies reporting  
107 on children with migrant and refugee backgrounds [25-27]. The main objective of this study is  
108 to conduct a systematic review and/or meta-analysis of the literature to explore the prevalence  
109 of neurodevelopmental disorders and their risk factors in young children (<6 years) with a  
110 parental history of migration in high-income countries. Specific review questions are the  
111 following:

- 112 i) What is the prevalence of neurodevelopmental disorders among preschool (<6  
113 years) children of migrants, according to internationally published literature?
- 114 ii) What are the risk factors or associated factors of neurodevelopmental disorders  
115 among preschool (<6 years) children of migrants, according to internationally  
116 published literature?

117

118

119

120

121

122

123

124

## 125 2. Methods

### 126 2.1. Protocol and Registration

127 The systematic review will be conducted using the Joanna Briggs Institute (JBI) methodology  
128 for systematic reviews of effectiveness [28] and reported using the PRISMA (Preferred  
129 Reporting Items for Systematic Reviews and Meta-Analyses) guidelines [29]. The protocol for  
130 this review was reported as per the PRISMA for Systematic Review Protocols (PRISMA-P)  
131 framework. Additionally, the review has been registered with PROSPERO  
132 (CRD42024589357).

### 133 2.2 Review Question

134 The primary review questions were designed based on the population/ participants, concept,  
135 and context (PCC) as recommended by the Joanna Briggs Institute JBI. The framework will  
136 suggest the search strategy and allow us to set the inclusion and exclusion criteria [30].

137 Table 1. Framework for inclusion criteria

| Parameter |                  | Criteria                                                                                                     |
|-----------|------------------|--------------------------------------------------------------------------------------------------------------|
| <b>P</b>  | Population       | Preschool children of migrants and refugees (as defined by the IOM (31), aged 0-6 years.                     |
| <b>C</b>  | Concept          | a. Prevalence of Neurodevelopmental Disorders (NDDs) as per the DSM-5<br>b. Risk factors/ predictors of NDDs |
| <b>C</b>  | Context/ setting | High-income countries, as defined by the World Bank [32]                                                     |

138

139 Among preschool children of migrant and refugee populations in high-income countries, what  
140 is the prevalence of neurodevelopmental disorders, and what are the risk factors affecting the  
141 disorders in question?

### 142 2.3 Inclusion Criteria

143 “Migrants and refugees” refer to groups of people moving for numerous reasons, often with  
144 overlapping motivations, as part of mixed movements – as defined by the United Nations High  
145 Commissioner for Refugees (UNHCR) [33]. According to the International Organization for  
146 Migration (IOM), a “migrant” is anyone who crosses an international border, leaving their

147 birthplace or usual place of residence, for instance, unauthorised entrants, asylum seekers, and  
148 irregular or undocumented migrants. This applies regardless of their legal status and includes  
149 authorised migrants who left for work, family, and study [31]. Additionally, “refugee”  
150 encompasses individuals who have been granted refugee status of humanitarian protection and  
151 those fleeing persecution or organised violence – as defined by IOM [31]. In this study, children  
152 of migrants and refugee populations residing in high-income countries will be included, as  
153 classified by the World Bank (countries with a Gross National Income per capita of USD  
154 13,205 or more) [32].

155 For our review, studies that included children aged between 0 and 5 years will be considered.  
156 Observational studies, such as cross-sectional and cohort studies (prospective and  
157 retrospective) that reported the prevalence of neurodevelopmental disorders and the risk factors  
158 among children of migrants, will also be included. Other studies, such as randomised  
159 controlled trials, case reports, opinions, letters to editors, and unpublished materials, will be  
160 excluded. Studies published in English in peer-reviewed journals will be included, with no  
161 restrictions on publication date.

#### 162 *2.4 Search Strategy*

163 The search strategy will be developed with opinions from two expert health-sciences librarians.  
164 A mix of specific medical subject headings (MeSH), free-text terms, and Boolean operators  
165 will be included. The search terms will focus on prevalence, risk factors, migrants, refugees,  
166 preschool children, and relevant high-income countries. First, these terms will be tested in the  
167 Medline (OVID) database. The reviewers (K.S.R and A.A.) with experience in database  
168 searches will conduct an initial pilot search on two databases. The reviewers will then carry  
169 out all remaining literature searches independently. The preliminary Medline (OVID) search  
170 strategy formulated with guidance from expert librarians in the field is outlined in Table 2.  
171 After completing the Medline (OVID) database search, we will use the same syntax and subject  
172 headings for the remaining databases and adapt where necessary. We will manually review  
173 reference lists of the qualifying studies and existing literature reviews, including background  
174 and forward citation tracking of the studies included.

175

176

177

178 **Table 2. Primary search strategy for Medline (OVID) (2<sup>nd</sup> of October 2024)**

| #  | Query                                                                                                                                                                                                                                                                                                                                                                                                                                                                                                                                                                                                                                                                                                                                                                                                                                                                                                                                                                                                                                                      | Results |
|----|------------------------------------------------------------------------------------------------------------------------------------------------------------------------------------------------------------------------------------------------------------------------------------------------------------------------------------------------------------------------------------------------------------------------------------------------------------------------------------------------------------------------------------------------------------------------------------------------------------------------------------------------------------------------------------------------------------------------------------------------------------------------------------------------------------------------------------------------------------------------------------------------------------------------------------------------------------------------------------------------------------------------------------------------------------|---------|
| 1  | Prevalence/                                                                                                                                                                                                                                                                                                                                                                                                                                                                                                                                                                                                                                                                                                                                                                                                                                                                                                                                                                                                                                                | 359205  |
| 2  | Risk Factors/                                                                                                                                                                                                                                                                                                                                                                                                                                                                                                                                                                                                                                                                                                                                                                                                                                                                                                                                                                                                                                              | 1000283 |
| 3  | (Prevalence* or risk factor*).mp.                                                                                                                                                                                                                                                                                                                                                                                                                                                                                                                                                                                                                                                                                                                                                                                                                                                                                                                                                                                                                          | 2201718 |
| 4  | 1 or 2 or 3                                                                                                                                                                                                                                                                                                                                                                                                                                                                                                                                                                                                                                                                                                                                                                                                                                                                                                                                                                                                                                                | 2201718 |
| 5  | exp Neurodevelopmental Disorders/                                                                                                                                                                                                                                                                                                                                                                                                                                                                                                                                                                                                                                                                                                                                                                                                                                                                                                                                                                                                                          | 218963  |
| 6  | exp Communication Disorders/                                                                                                                                                                                                                                                                                                                                                                                                                                                                                                                                                                                                                                                                                                                                                                                                                                                                                                                                                                                                                               | 70764   |
| 7  | exp Autism Spectrum Disorder/                                                                                                                                                                                                                                                                                                                                                                                                                                                                                                                                                                                                                                                                                                                                                                                                                                                                                                                                                                                                                              | 46231   |
| 8  | exp "Attention Deficit and Disruptive Behavior Disorders"/                                                                                                                                                                                                                                                                                                                                                                                                                                                                                                                                                                                                                                                                                                                                                                                                                                                                                                                                                                                                 | 41201   |
| 9  | exp Specific Learning Disorder/                                                                                                                                                                                                                                                                                                                                                                                                                                                                                                                                                                                                                                                                                                                                                                                                                                                                                                                                                                                                                            | 10419   |
| 10 | exp Motor Disorders/                                                                                                                                                                                                                                                                                                                                                                                                                                                                                                                                                                                                                                                                                                                                                                                                                                                                                                                                                                                                                                       | 1127    |
| 11 | exp Tic Disorders/                                                                                                                                                                                                                                                                                                                                                                                                                                                                                                                                                                                                                                                                                                                                                                                                                                                                                                                                                                                                                                         | 6159    |
| 12 | exp Schizophrenia/                                                                                                                                                                                                                                                                                                                                                                                                                                                                                                                                                                                                                                                                                                                                                                                                                                                                                                                                                                                                                                         | 118287  |
| 13 | exp Personality Disorders/                                                                                                                                                                                                                                                                                                                                                                                                                                                                                                                                                                                                                                                                                                                                                                                                                                                                                                                                                                                                                                 | 46206   |
| 14 | exp Catatonia/                                                                                                                                                                                                                                                                                                                                                                                                                                                                                                                                                                                                                                                                                                                                                                                                                                                                                                                                                                                                                                             | 2978    |
| 15 | exp Mental Disorders/                                                                                                                                                                                                                                                                                                                                                                                                                                                                                                                                                                                                                                                                                                                                                                                                                                                                                                                                                                                                                                      | 1509921 |
| 16 | exp "Bipolar and Related Disorders"/                                                                                                                                                                                                                                                                                                                                                                                                                                                                                                                                                                                                                                                                                                                                                                                                                                                                                                                                                                                                                       | 46618   |
| 17 | "bipolar and related disorders"/ or exp depressive disorder/ or<br>cyclothymic disorder/                                                                                                                                                                                                                                                                                                                                                                                                                                                                                                                                                                                                                                                                                                                                                                                                                                                                                                                                                                   | 126696  |
| 18 | exp Anxiety Disorders/                                                                                                                                                                                                                                                                                                                                                                                                                                                                                                                                                                                                                                                                                                                                                                                                                                                                                                                                                                                                                                     | 94708   |
| 19 | exp Substance-Related Disorders/                                                                                                                                                                                                                                                                                                                                                                                                                                                                                                                                                                                                                                                                                                                                                                                                                                                                                                                                                                                                                           | 321725  |
| 20 | exp Body Dysmorphic Disorders/                                                                                                                                                                                                                                                                                                                                                                                                                                                                                                                                                                                                                                                                                                                                                                                                                                                                                                                                                                                                                             | 1355    |
| 21 | exp Mental Disorders/                                                                                                                                                                                                                                                                                                                                                                                                                                                                                                                                                                                                                                                                                                                                                                                                                                                                                                                                                                                                                                      | 1509921 |
| 22 | exp "Feeding and Eating Disorders"/                                                                                                                                                                                                                                                                                                                                                                                                                                                                                                                                                                                                                                                                                                                                                                                                                                                                                                                                                                                                                        | 38000   |
| 23 | exp Elimination Disorders/                                                                                                                                                                                                                                                                                                                                                                                                                                                                                                                                                                                                                                                                                                                                                                                                                                                                                                                                                                                                                                 | 5738    |
| 24 | exp Sleep Wake Disorders/                                                                                                                                                                                                                                                                                                                                                                                                                                                                                                                                                                                                                                                                                                                                                                                                                                                                                                                                                                                                                                  | 115641  |
| 25 | exp sleep apnea syndromes/ or exp sleep apnea, obstructive/                                                                                                                                                                                                                                                                                                                                                                                                                                                                                                                                                                                                                                                                                                                                                                                                                                                                                                                                                                                                | 45562   |
| 26 | exp Sleep Disorders, Circadian Rhythm/                                                                                                                                                                                                                                                                                                                                                                                                                                                                                                                                                                                                                                                                                                                                                                                                                                                                                                                                                                                                                     | 2875    |
| 27 | exp Parasomnias/                                                                                                                                                                                                                                                                                                                                                                                                                                                                                                                                                                                                                                                                                                                                                                                                                                                                                                                                                                                                                                           | 9504    |
| 28 | exp Sexual Dysfunctions, Psychological/                                                                                                                                                                                                                                                                                                                                                                                                                                                                                                                                                                                                                                                                                                                                                                                                                                                                                                                                                                                                                    | 31245   |
| 29 | exp Neurocognitive Disorders/                                                                                                                                                                                                                                                                                                                                                                                                                                                                                                                                                                                                                                                                                                                                                                                                                                                                                                                                                                                                                              | 331222  |
| 30 | (Intellectual* Disabilit* or Global Developmental Delay* or<br>Communication Disorder* or Language Disorder* or Speech Sound<br>Disorder* or Phonological Disorder* or Childhood-Onset Fluency<br>Disorder* or Stuttering* or Communication Disorder* or Autism*<br>or autistic* or Attention-Deficit* or Hyperactivity Disorder* or<br>Learning Disorder* or Motor Disorder* or Developmental<br>Coordination Disorder* or Stereotypic Movement Disorder* or Tic<br>Disorder* or Tourette* Disorder* or Motor disorder* or Tic<br>Disorder* or Neurodevelopmental Disorder* or Schizophrenia* or<br>Psychotic Disorder* or Schizotypal* or Personality Disorder* or<br>Delusional Disorder* or Brief Psychotic Disorder* or<br>Schizophreniform Disorder* or Schizoaffective Disorder* or<br>Psychotic Disorder* or Catatonia* or mental disorder* or Bipolar*<br>or Cyclothymic Disorder* or Substance* disorder* or Depressive<br>Disorder* or Disruptive Mood Dysregulation Disorder* or<br>Depressive Disorder* or Persistent Depressive Disorder* or | 1365436 |

Dysthymia\* or Premenstrual Dysphoric Disorder\* or Anxiet\* or Selective Mutism\* or Phobia\* or Panic Disorder\* or Agoraphobia\* or Obsessive-Compulsive\* or Body Dysmorphic Disorder\* or Hoarding Disorder\* or Trichotillomania or Hair-Pulling Disorder\* or Excoriation\* or Skin-Picking Disorder\* or Trauma\*disorder\* or stress\* Disorder\* or Reactive Attachment Disorder\* or Disinhibited Social Engagement Disorder\* or Posttraumatic Stress Disorder\* or Acute Stress Disorder\* or Adjustment Disorder\* or Dissociative Disorder\* or Dissociative Amnesia\* or Depersonali?ation\* disorder\* or Dereali?ation Disorder\* or Somatic Symptom disorder\*or Illness Anxiety Disorder\* or Conversion Disorder\*or Functional Neurological Symptom Disorder\*or Factitious Disorder\* or Somatic Symptom\* or "Feeding and Eating Disorder\*" or Pica or Rumination Disorder\*or Food Intake Disorder\* or Anorexia Nervosa\* or "Bulimia Nervosa\*" or "Binge-Eating Disorder\*" or "Elimination Disorder\*" or Enuresis\* or Encopresis or "Sleep-Wake Disorder\*" or "Insomnia Disorder\*" or "Hypersomnolence Disorder\*" or Narcolepsy or "Breathing-Related Sleep Disorder\*" or "Sleep Apnea\*" or Hypopnea or "Sleep-Related Hypoventilation\*" or "Circadian Rhythm Sleep-Wake Disorder\*" or Parasomnias or "Non-Rapid Eye Movement Sleep Arousal Disorder\*" or Sleepwalking\* or "Sleep Terror\*" or "Nightmare Disorder\*" or "Rapid Eye Movement Sleep Behavio\* Disorder\*" or "Restless Legs Syndrome\*" or "Sleep\* Disorder\*" or "Insomnia Disorder\*" or "Hypersomnolence Disorder\*" or "Sexual Dysfunction\*" or "Delayed Ejaculat\*" or "Erectile Disorder\*" or "Female Orgasmic Disorder\*" or "Female Sexual\* Disorder\*" or "Genito-Pelvic Pain\* Disorder\*" or "Male Hypoactive Sexual Desire Disorder\* Premature Ejaculation\*" or "Sexual Dysfunction\*" or "Gender Dysphoria\*" or "Oppositional Defiant Disorder\*" or "Intermittent Explosive Disorder\*" or "Conduct Disorder\*" or "Antisocial Personality Disorder\*" or Pyromania\* or Kleptomania\* or "Substance\* Disorder\*" or "Alcohol\* Disorder\*" or "Alcohol Intoxication\*" or "Alcohol Withdrawal\*" or "Caffeine\* Disorder\*" or "Caffeine Intoxicat\*" or "Caffeine Withdrawal\*" or "Cannabis\* disorder\*" or "Cannabis Intoxicat\*" or "Cannabis Withdrawal\*" or "Hallucinogen\* Disorder\*" or "Phencyclidine\* Disorder\*" or "Phencyclidine Intoxicat\*" or "Hallucinogen Intoxicat\*" or "Hallucinogen Persisting Perception Disorder\*" or "Phencyclidine-Induced Disorder\*" or "Hallucinogen-Induced Disorder\*" or "Inhalant\* Disorder\*" or "Inhalant Intoxicat\*" or "Opioid\* Disorder\*" or "Opioid Intoxicat\*" or "Opioid Withdrawal\*" or "Sedative\* disorder" or "Anxiolytic\* Disorder\*" or "Anxiolytic Withdrawal\*" or "Hypnotic disorder\*" or "Stimulant\* Disorder\*" or "Stimulant Intoxication\*" or "Stimulant Withdrawal\*" or "Tobacco\* Disorder\*" or Gambling Disorder\* or Neurocognitive Disorder\* or Delirium\* or Neurocognitive Disorder\* or Personality Disorder\* or Personality Disorder\* or Paranoid Personality Disorder\* or Schizoid Personality Disorder\* or Schizotypal Personality Disorder\* or Paraphilic Disorder\* or



|    |                                                                                                                                                                                                                                                                                                                                                                                                                                                                                                                                                                                                                                                                                                                                                                                                                                                                                                                                                                                                                                                                                                                                                                                                                                                                                                                                                                                                                                                                                                                       |         |
|----|-----------------------------------------------------------------------------------------------------------------------------------------------------------------------------------------------------------------------------------------------------------------------------------------------------------------------------------------------------------------------------------------------------------------------------------------------------------------------------------------------------------------------------------------------------------------------------------------------------------------------------------------------------------------------------------------------------------------------------------------------------------------------------------------------------------------------------------------------------------------------------------------------------------------------------------------------------------------------------------------------------------------------------------------------------------------------------------------------------------------------------------------------------------------------------------------------------------------------------------------------------------------------------------------------------------------------------------------------------------------------------------------------------------------------------------------------------------------------------------------------------------------------|---------|
|    | Voyeuristic Disorder* or Exhibitionistic Disorder* or Frotteuristic Disorder* or Sexual Masochism Disorder* or Sexual Sadism Disorder* or Pedophilic Disorder* or Fetishistic Disorder* or Transvestic Disorder* or Mental Disorder*).mp.                                                                                                                                                                                                                                                                                                                                                                                                                                                                                                                                                                                                                                                                                                                                                                                                                                                                                                                                                                                                                                                                                                                                                                                                                                                                             |         |
| 31 | 5 or 6 or 7 or 8 or 9 or 10 or 11 or 12 or 13 or 14 or 15 or 16 or 17 or 18 or 19 or 20 or 21 or 22 or 23 or 24 or 25 or 26 or 27 or 28 or 29 or 30                                                                                                                                                                                                                                                                                                                                                                                                                                                                                                                                                                                                                                                                                                                                                                                                                                                                                                                                                                                                                                                                                                                                                                                                                                                                                                                                                                   | 2029481 |
| 32 | exp "Transients and Migrants"/                                                                                                                                                                                                                                                                                                                                                                                                                                                                                                                                                                                                                                                                                                                                                                                                                                                                                                                                                                                                                                                                                                                                                                                                                                                                                                                                                                                                                                                                                        | 15053   |
| 33 | (migrant* or immigrant* or emigrant* or migration*).mp.                                                                                                                                                                                                                                                                                                                                                                                                                                                                                                                                                                                                                                                                                                                                                                                                                                                                                                                                                                                                                                                                                                                                                                                                                                                                                                                                                                                                                                                               | 425986  |
| 34 | "Culturally and linguistically".mp.                                                                                                                                                                                                                                                                                                                                                                                                                                                                                                                                                                                                                                                                                                                                                                                                                                                                                                                                                                                                                                                                                                                                                                                                                                                                                                                                                                                                                                                                                   | 1984    |
| 35 | Cultural diversity/                                                                                                                                                                                                                                                                                                                                                                                                                                                                                                                                                                                                                                                                                                                                                                                                                                                                                                                                                                                                                                                                                                                                                                                                                                                                                                                                                                                                                                                                                                   | 13427   |
| 36 | (cultural* divers* or ethnic*).mp.                                                                                                                                                                                                                                                                                                                                                                                                                                                                                                                                                                                                                                                                                                                                                                                                                                                                                                                                                                                                                                                                                                                                                                                                                                                                                                                                                                                                                                                                                    | 253077  |
| 37 | Ethnicity/                                                                                                                                                                                                                                                                                                                                                                                                                                                                                                                                                                                                                                                                                                                                                                                                                                                                                                                                                                                                                                                                                                                                                                                                                                                                                                                                                                                                                                                                                                            | 76660   |
| 38 | ethnic*.mp. or "Ethnic and Racial Minorities"/                                                                                                                                                                                                                                                                                                                                                                                                                                                                                                                                                                                                                                                                                                                                                                                                                                                                                                                                                                                                                                                                                                                                                                                                                                                                                                                                                                                                                                                                        | 240137  |
| 39 | Refugee*.mp. or Refugees/                                                                                                                                                                                                                                                                                                                                                                                                                                                                                                                                                                                                                                                                                                                                                                                                                                                                                                                                                                                                                                                                                                                                                                                                                                                                                                                                                                                                                                                                                             | 20225   |
| 40 | 32 or 33 or 34 or 35 or 36 or 37 or 38 or 39                                                                                                                                                                                                                                                                                                                                                                                                                                                                                                                                                                                                                                                                                                                                                                                                                                                                                                                                                                                                                                                                                                                                                                                                                                                                                                                                                                                                                                                                          | 680044  |
| 41 | child/ or child, preschool/ or infant/                                                                                                                                                                                                                                                                                                                                                                                                                                                                                                                                                                                                                                                                                                                                                                                                                                                                                                                                                                                                                                                                                                                                                                                                                                                                                                                                                                                                                                                                                | 2504975 |
| 42 | (infant* or newborn* or child*).mp.                                                                                                                                                                                                                                                                                                                                                                                                                                                                                                                                                                                                                                                                                                                                                                                                                                                                                                                                                                                                                                                                                                                                                                                                                                                                                                                                                                                                                                                                                   | 3633778 |
| 43 | 41 or 42                                                                                                                                                                                                                                                                                                                                                                                                                                                                                                                                                                                                                                                                                                                                                                                                                                                                                                                                                                                                                                                                                                                                                                                                                                                                                                                                                                                                                                                                                                              | 3633778 |
| 44 | ((high* or upper) adj5 income? adj5 (countr* or econom* or group? or nation?)).mp.                                                                                                                                                                                                                                                                                                                                                                                                                                                                                                                                                                                                                                                                                                                                                                                                                                                                                                                                                                                                                                                                                                                                                                                                                                                                                                                                                                                                                                    | 21629   |
| 45 | (America* or Andorra* or Antigua* or Aruba* or Australia* or Austria* or Barbuda* or Bermuda* or Britain or British or Baham* or Bahrain* or Barbud* or Belgium or Belgian* or Brunei* or Canada or Canadian* or Cayman Island* or Channel Island* or Chile* or Croatia* or Curacao* or Cyprus or Cyprian* or Cypriot? or Czech* or Darussalam or Denmark or Danish or England or English or Estonia* or Faroe Island* or Finland or Finnish or Finn? or France or French or German* or Gibralt* or Greece or Greek* or Greenland* or Guam* or Hong Kong* or Hungary or Hungarian* or Iceland* or Ireland or Irish or "Isle of Man" or Israel* or Italy or Italian* or Japan* or South Korea* or Kuwait* or Latvia* or Liechtenstein* or Lithuania* or Luxembourg* or Macao* or Malta or Maltese or Monaco or Nauru* or Netherlands or Dutch or New Caledonia* or New Zealand* or Northern Mariana Island* or Norway or Norwegian* or Oman* or Panama* or Poland or Polish or Portug* or Puerto Ric* or Romania* or Qatar* or Saint Kitts or San Marino or Saint Martin or Sint Maarten or Saudi Arabia* or Seychelles or Singapore* or Slovak* or Slovenia* or Scotland or Scottish or Spain or Spanish or Sweden or Swedish or Switzerland or Swiss or Taiwan* or Trinidad* or Tobago* or (Turks and Caicos Island*) or United Arab Emirates or United Kingdom or UK or Great Britain or United States or USA or Uruguay* or Virgin Island* or Wales or Welsh or (western adj (countr* or econom* or nation*))).mp. | 6240757 |
| 46 | (America* or Andorra* or Antigua* or Aruba* or Australia* or Austria* or Barbuda* or Bermuda* or Britain or British or Baham* or Bahrain* or Barbud* or Belgium or Belgian* or Brunei* or Canada or Canadian* or Cayman Island* or Channel Island* or                                                                                                                                                                                                                                                                                                                                                                                                                                                                                                                                                                                                                                                                                                                                                                                                                                                                                                                                                                                                                                                                                                                                                                                                                                                                 | 2913320 |

Chile\* or Croatia\* or Curacao\* or Cyprus or Cyprian\* or Cypriot?  
 or Czech\* or Darussalam or Denmark or Danish or England or  
 English or Estonia\* or Faroe Island\* or Finland or Finnish or Finn?  
 or France or French or German\* or Gibraltar\* or Greece or Greek\*  
 or Greenland\* or Guam\* or Hong Kong\* or Hungary or Hungarian\*  
 or Iceland\* or Ireland or Irish or "Isle of Man" or Israel\* or Italy or  
 Italian\* or Japan\* or South Korea\* or Kuwait\* or Latvia\* or  
 Liechtenstein\* or Lithuania\* or Luxembourg\* or Macao\* or Malta  
 or Maltese or Monaco or Nauru\* or Netherlands or Dutch or New  
 Caledonia\* or New Zealand\* or Northern Mariana Island\* or  
 Norway or Norwegian\* or Oman\* or Panama\* or Poland or Polish  
 or Portug\* or Puerto Ric\* or Romania\* or Qatar\* or Saint Kitts or  
 San Marino or Saint Martin or Sint Maarten or Saudi Arabia\* or  
 Seychelles or Singapore\* or Slovak\* or Slovenia\* or Scotland or  
 Scottish or Spain or Spanish or Sweden or Swedish or Switzerland  
 or Swiss or Taiwan\* or Trinidad\* or Tobago\* or (Turks and Caicos  
 Island\*) or United Arab Emirates or United Kingdom or UK or  
 United States or USA or Uruguay\* or Virgin Island\* or Wales or  
 Welsh or (western adj (count\* or econom\* or nation\*))).sh.

|    |                               |         |
|----|-------------------------------|---------|
| 47 | 44 or 45 or 46                | 6254004 |
| 58 | 4 and 31 and 40 and 43 and 47 | 1984    |

179

180 *2.5 Information Sources*

181 The following electronic databases will be searched without any restrictions on publication  
 182 date (i.e., from the time of database inception to the present): MEDLINE (Ovid), Embase  
 183 (Ovid), PsycINFO, Scopus, and Cumulative Index to Nursing and Allied Health Literature  
 184 (CINAHL) (EBSCO). Search will be limited to English language only.

185 *2.6 Study Selection*

186 The studies identified through electronic databases and citations will be imported into EndNote  
 187 21 (Clarivate Analytics, Philadelphia, PA, USA). All the duplicates will be removed. After a  
 188 pilot test, two independent reviewers (K.S.R. and A.A.) will review the titles and abstracts,  
 189 adhering strictly to the inclusion and exclusion criteria. Total text will be retrieved for  
 190 clarification if necessary. Then, the articles that meet the inclusion criteria will be retrieved in  
 191 full, and their details will be imported into the JBI System for Unified Management,  
 192 Assessment and Review of Information (JBI SUMARI) [34]. The same two reviewers will then  
 193 independently evaluate the full texts to confirm eligibility. When we need additional  
 194 information, the study authors will be contacted. Any disagreements with the reviewer will be  
 195 addressed through discussion involving a third reviewer (J.J.) if necessary. The reasons for  
 196 excluding full-text studies will be recorded and reported in the systematic review. If we find

197 multiple articles published from the same study, they will be linked. The study selection  
198 process will be presented as a Preferred Reporting Items for Systematic Reviews and Meta-  
199 Analysis (PRISMA) flow diagrams [35].

### 200 *2.7 Assessment of Methodological Quality*

201 Each study included in this review will be assessed distinctly by two reviewers (K.S.R and  
202 A.A.) for methodological quality. A standardised critical appraisal tool developed by the  
203 Joanna Briggs Institute (JBI) will be used to determine the calibre of the articles included in  
204 the study [36]. Relevant quantitative tools will be used from JBI. Any disagreements will be  
205 solved between the two reviewers through discussion, and a third reviewer (J.J.) will be  
206 included when required. The authors of the study will be contacted to request missing or  
207 additional information where necessary to ensure the methodological quality. The studies will  
208 be assessed based on the available information if there is no response from the authors  
209 following two attempts. The risk of bias will be presented for each study through tables and  
210 figures and described narratively in the final review publication. The methodological concerns  
211 and their impact on result interpretation will be addressed in this narrative. All articles  
212 considered in this review will be subject to data extraction and synthesis, regardless of their  
213 methodological quality outcomes. Where possible, each study will be included for data  
214 extraction and synthesis irrespective of their methodological quality.

### 215 *2.8 Data Extraction*

216 A standard data extraction tool (see Table 1 in the Appendix) has been developed, which will  
217 be piloted in one study. The tool will be refined to ensure that all relevant data is captured. A  
218 calibration exercise will be conducted to ensure consistency among the two reviewers. Two  
219 authors (K.S.R and A.A.) will independently extract the discrepancies between them, which  
220 will be resolved by involving a third author (K.E.) when necessary. The extracted data will be  
221 recorded in an Excel spreadsheet with article details, participant characteristics, prevalence and  
222 risk factors of neurodevelopment disorders, type of migrant or refugee, study context, etc. Any  
223 additional information relevant to our study will be recorded, and the data extraction form will  
224 be modified accordingly. The authors of the study will be contacted when we require any  
225 additional information. If there is no response from the authors following two attempts, we will  
226 continue with the available information. The extracted data will be presented in narrative form  
227 and tables.

228

## 229 2.9 Data Synthesis

230 Quantitative data synthesis methods will be used to address the research findings  
231 comprehensively. The results will be categorised into settings, considering the origin of the  
232 participants and other environmental features. Depending on the number of eligible articles, a  
233 weighted inverse variance random-effects model will be used to estimate the overall pooled  
234 prevalence of neurodevelopmental disorders [37]. Otherwise, we will report the findings  
235 narratively. A subgroup analysis will be conducted based on the geographical area of the listed  
236 studies, study design, geographical origin of the study population, and type of  
237 neurodevelopment disorders to account for potential discrepancies in the overall prevalence  
238 estimates. Another subgroup analysis will be conducted in high-risk subgroups, such as  
239 recently resettled migrants/ refugees (< 5 years versus long-term) and migrants/ refugees from  
240 humanitarian crises. These subgroups could be more vulnerable to health conditions due to  
241 specific socioeconomic conditions, access to healthcare, and health inequalities. By identifying  
242 these sub-groups and analysing them separately, we aim to provide more unique insights into  
243 the comprehensive needs of these populations. Further sub-group analysis will be conducted  
244 based on the regional differences, for instance, population in North America, Europe, and  
245 Australia/ New Zealand, to address contextual variability across high-income countries.  
246 Furthermore, a sensitivity analysis will be conducted to assess the robustness of the findings  
247 by excluding the studies with a high risk of bias or those that use different definitions or  
248 measurements of Neurodevelopment disorders. The publication bias among the studies will be  
249 assessed using a funnel plot and Egger's regression test [38]. A narrative synthesis of the study  
250 findings will be used in tables and figures where statistical pooling is challenging due to  
251 heterogeneity among the studies. Stata 18 will be used for any statistical analysis to ensure  
252 rigorous data evaluation, leading to more valid and reliable conclusions.

## 253 3. Conclusions

254 The systematic review aims to provide overarching details on the prevalence of  
255 neurodevelopmental disorders and risk factors among preschool children of migrants (aged 0  
256 to 6 years) in a global context. Understanding the risk factors is crucial to knowing what  
257 contributes to this population's higher prevalence of neurodevelopmental disorders. The  
258 findings can help to design targeted interventions, develop culturally appropriate programs and  
259 attenuate these risks. Policymakers and health officials can use the review findings to address  
260 the unique challenges faced by children and their migrant parents within the health system. Our

261 research also prioritises the necessity of including a diverse group in health research. Migrant  
262 population has their unique cultural practices, norms, and traditions. In this review, we will try  
263 to address this insufficiently represented group and contribute to equitable health research  
264 practices.

265 **Funding:** Western Sydney University International Master of Research (MRes) Scholarship.

266 **Institutional Review Board Statement:** Not applicable.

267 **Informed Consent Statement:** Not applicable.

268 **Data Availability Statement:** Not applicable.

269 **Author Contributions:** K.S.R., K.E., and A.A. led the protocol design, search strategy,  
270 drafting, and revision of the manuscript. A.A. provided statistical advice and drafted and  
271 revised the manuscript. V.E., M.S., J.J., and A.A. were involved in the conception and design  
272 of the protocol, drafting, and revisions of the manuscript. All authors have read and agreed to  
273 the published version of the manuscript.

274 **Acknowledgements:** This study is being completed as part of the Master of Research (MRes)  
275 degree for K.S.R. and acknowledges the Western Sydney University International Master of  
276 Research Scholarship.

277 **Conflicts of Interest:** The authors declare no conflict of interest.

## 278 **References**

- 279 1. Psychiatric Association American. Neurodevelopmental disorders: DSM-5 selections.  
280 American Psychiatric Publishing; 2015.
- 281 2. Boivin MJ, Kakooza AM, Warf BC, Davidson LL, Grigorenko EL. Reducing  
282 neurodevelopmental disorders and disability through research and interventions.  
283 Nature. 2015 Nov 19;527(7578):S155-60. doi: 10.1038/nature16029. PMID:  
284 26580321.
- 285 3. World Health Organization, United Nations Children's Fund. Global report on children  
286 with developmental disabilities: from the margins to the mainstream. World Health  
287 Organization; 2023 Sep 15.
- 288 4. Frances L, Quintero J, Fernandez A, et al. Current state of knowledge on the prevalence  
289 of neurodevelopmental disorders in childhood according to the DSM-5: a systematic

- 290 review in accordance with the PRISMA criteria. *Child Adolesc Psychiatry Ment*  
291 *Health*. 2022;16:27; <https://doi.org/10.1186/s13034-022-00462-1>
- 292 5. Halfon N, Houtrow A, Larson K, Newacheck PW. The changing landscape of disability  
293 in childhood. *Future Child*. 2012;22:13-42; <https://doi.org/10.1353/foc.2012.0004>
- 294 6. Boyle CA, Boulet S, Schieve LA, et al. Trends in the prevalence of developmental  
295 disabilities in US Children, 1997-2008. *Pediatrics*. 2011;127:1034-1042; <https://doi.org/10.1542/peds.2010-2989>.
- 296
- 297 7. Bitta M, Kariuki SM, Abubakar A, Newton CRJC. Burden of neurodevelopmental  
298 disorders in low and middle-income countries: a systematic review and meta-analysis.  
299 *Wellcome Open Res*. 2017;2:121-136; <https://doi.org/10.12688/wellcomeopenres.13540.3>
- 300 8. Durkin MS, Schneider H, Pathania VS, et al. Learning and Developmental Disabilities.  
301 In: *Disease Control Priorities in Developing Countries*. 2nd ed. The International Bank  
302 for Reconstruction and Development / The World Bank, Washington (DC); 2006.  
303 PMID: 21250359.
- 304 9. Durkin M. The epidemiology of developmental disabilities in low-income countries.  
305 *Mental retardation and developmental disabilities research reviews*. 2002;8(3):206-11.
- 306 10. Abdullahi I, Wong K, Mutch R, Glasson EJ, de Klerk N, Cherian S, Downs J, Leonard  
307 H. Risk of Developmental Disorders in Children of Immigrant Mothers: A Population-  
308 Based Data Linkage Evaluation. *J Pediatr*. 2019 Jan;204:275-284.e3. doi:  
309 10.1016/j.jpeds.2018.08.047. Epub 2018 Oct 4. PMID: 30293641.
- 310 11. Loi S, Pitkänen J, Moustgaard H, Myrskylä M, Martikainen P. Health of immigrant  
311 children: the role of immigrant generation, exogamous family setting, and family  
312 material and social resources. *Demography*. 2021 Oct 1;58(5):1655-85.
- 313 12. Lehti V, Gyllenberg D, Suominen A, Sourander A. Finnish-born children of immigrants  
314 are more likely to be diagnosed with developmental disorders related to speech and  
315 language, academic skills and coordination. *Acta paediatrica*. 2018 Aug;107(8):1409-  
316 17.
- 317 13. Leonard, H., Glasson, E., Nassar, N., Whitehouse, A., Bebbington, A., Bourke, J., ... &  
318 Stanley, F. (2011). Autism and intellectual disability are differentially related to  
319 sociodemographic background at birth. *PloS one*, 6(3), e17875.
- 320 14. Gerritsen AA, Bramsen I, Devillé W, van Willigen LH, Hovens JE, van der Ploeg HM.  
321 Physical and mental health of Afghan, Iranian and Somali asylum seekers and refugees  
322 living in the Netherlands. *Soc Psychiatry Psychiatr Epidemiol*. 2006 Jan;41(1):18-26.  
323 doi: 10.1007/s00127-005-0003-5. Epub 2006 Jan 1. PMID: 16341619.

- 324 15. Ikram UZ, Snijder MB, Fassaert TJ, Schene AH, Kunst AE, Stronks K. The  
325 contribution of perceived ethnic discrimination to the prevalence of depression. *Eur J*  
326 *Public Health*. 2015 Apr;25(2):243-8. doi: 10.1093/eurpub/cku180. Epub 2014 Nov 21.  
327 PMID: 25416918.
- 328 16. Ellen Selman L, Fox F, Aabe N, Turner K, Rai D, Redwood S. 'You are labelled by  
329 your children's disability' - A community-based, participatory study of stigma among  
330 Somali parents of children with autism living in the United Kingdom. *Ethn Health*.  
331 2018 Oct;23(7):781-796. doi: 10.1080/13557858.2017.1294663. Epub 2017 Mar 2.  
332 PMID: 28277014.
- 333 17. Fox F, Aabe N, Turner K, Redwood S, Rai D. "It was like walking without knowing  
334 where I was going": A Qualitative Study of Autism in a UK Somali Migrant  
335 Community. *J Autism Dev Disord*. 2017 Feb;47(2):305-315. doi: 10.1007/s10803-016-  
336 2952-9. PMID: 27858263; PMCID: PMC5309314.
- 337 18. Begeer S, Bouk SE, Boussaid W, Terwogt MM, Koot HM. Underdiagnosis and referral  
338 bias of autism in ethnic minorities. *J Autism Dev Disord*. 2009 Jan;39(1):142-8. doi:  
339 10.1007/s10803-008-0611-5. Epub 2008 Jul 4. PMID: 18600440.
- 340 19. Magaña S, Lopez K, Aguinaga A, Morton H. Access to diagnosis and treatment services  
341 among latino children with autism spectrum disorders. *Intellect Dev Disabil*. 2013  
342 Jun;51(3):141-53. doi: 10.1352/1934-9556-51.3.141. PMID: 23834211.
- 343 20. Delobel-Ayoub M, Ehlinger V, Klapouszczak D, Maffre T, Raynaud JP, Delpierre C,  
344 Arnaud C. Socioeconomic Disparities and Prevalence of Autism Spectrum Disorders  
345 and Intellectual Disability. *PLoS One*. 2015 Nov 5;10(11):e0141964. doi:  
346 10.1371/journal.pone.0141964. PMID: 26540408; PMCID: PMC4635003.
- 347 21. Miller LL, Gustafsson HC, Tipsord J, Song M, Nousen E, Dieckmann N, Nigg JT. Is  
348 the Association of ADHD with Socioeconomic Disadvantage Explained by Child  
349 Comorbid Externalizing Problems or Parent ADHD? *J Abnorm Child Psychol*. 2018  
350 Jul;46(5):951-963. doi: 10.1007/s10802-017-0356-8. PMID: 29128953; PMCID:  
351 PMC5948120.
- 352 22. Ikram UZ, Snijder MB, Fassaert TJ, Schene AH, Kunst AE, Stronks K. The  
353 contribution of perceived ethnic discrimination to the prevalence of depression. *Eur J*  
354 *Public Health*. 2015 Apr;25(2):243-8. doi: 10.1093/eurpub/cku180. Epub 2014 Nov 21.  
355 PMID: 25416918.

- 356 23. Daseking M, Bauer A, Knievel J, Petermann F, Waldmann HC. Cognitive development  
357 and risk factors in bilingual pre-school children from an immigrant background. *Praxis*  
358 *der kinderpsychologie und kinderpsychiatrie*. 2011 Jan 1;60(5):351-68.
- 359 24. Graham HR, Minhas RS, Paxton G. Learning problems in children of refugee  
360 background: A systematic review. *Pediatrics*. 2016 Jun 1;137(6).
- 361 25. Crafa D, Warfa N. Maternal migration and autism risk: systematic analysis.  
362 *International review of psychiatry*. 2015 Jan 2;27(1):64-71.
- 363 26. Fairthorne J, de Klerk N, Leonard HM, Schieve LA, Yeargin-Allsopp M. Maternal  
364 race–ethnicity, immigrant status, country of birth, and the odds of a child with autism.  
365 *Child neurology open*. 2017 Jan 12;4:2329048X16688125.
- 366 27. Leonard H, Glasson E, Nassar N, Whitehouse A, Bebbington A, Bourke J, Jacoby P,  
367 Dixon G, Malacova E, Bower C, Stanley F. Autism and intellectual disability are  
368 differentially related to sociodemographic background at birth. *PloS one*. 2011 Mar  
369 30;6(3):e17875.
- 370 28. Tufanaru C, Munn Z, Aromataris E, Campbell J, Hopp L. Systematic reviews of  
371 effectiveness. *Joanna Briggs Institute reviewer’s manual*. 2017 Apr 19;3.
- 372 29. Page MJ, McKenzie JE, Bossuyt PM, Boutron I, Hoffmann TC, Mulrow CD, Shamseer  
373 L, Tetzlaff JM, Akl EA, Brennan SE, Chou R. The PRISMA 2020 statement: an  
374 updated guideline for reporting systematic reviews. *bmj*. 2021 Mar 29;372.
- 375 30. Pollock D, Peters MD, Khalil H, McInerney P, Alexander L, Tricco AC, Evans C, de  
376 Moraes ÉB, Godfrey CM, Pieper D, Saran A. Recommendations for the extraction,  
377 analysis, and presentation of results in scoping reviews. *JBI evidence synthesis*. 2023  
378 Mar 1;21(3):520-32.
- 379 31. International Organization for Migration. *Glossary on Migration*; International  
380 Organization for Migration (IOM): Geneva, Switzerland, 2019.
- 381 32. The World Bank. *World Bank Country and Lending Groups*; The World Bank:  
382 Washington, DC, USA, 2022.
- 383 33. Assembly UG. *New York declaration for refugees and migrants*. Resolution adopted  
384 by the General Assembly. 2016 Sep:19.
- 385 34. Munn Z, Aromataris E, Tufanaru C, Stern C, Porritt K, Farrow J, Lockwood C,  
386 Stephenson M, Moola S, Lizarondo L, McArthur A. The development of software to  
387 support multiple systematic review types: the Joanna Briggs Institute System for the



- 388 Unified Management, Assessment and Review of Information (JBI SUMARI). JBI  
389 evidence implementation. 2019 Mar 1;17(1):36-43.
- 390 35. Page MJ, McKenzie JE, Bossuyt PM, Boutron I, Hoffmann TC, Mulrow CD, Shamseer  
391 L, Tetzlaff JM, Akl EA, Brennan SE, Chou R. The PRISMA 2020 statement: an  
392 updated guideline for reporting systematic reviews. *bmj*. 2021 Mar 29;372.
- 393 36. Munn Z, Moola S, Riitano D, Lisy K. The development of a critical appraisal tool for  
394 use in systematic reviews addressing questions of prevalence. *International journal of*  
395 *health policy and management*. 2014 Aug;3(3):123.
- 396 37. DerSimonian R, Kacker R. Random-effects model for meta-analysis of clinical trials:  
397 an update. *Contemporary clinical trials*. 2007 Feb 1;28(2):105-14.
- 398 **38.** Munn Z, Moola S, Riitano D, Lisy K. The development of a critical appraisal tool for  
399 use in systematic reviews addressing questions of prevalence. *International journal of*  
400 *health policy and management*. 2014 Aug;3(3):123.
- 401
- 402

## Appendix

**Table 1.** Data extraction template

| Study Details                                                                                                                                                                                                                                 | Population                                                                                                                                                                                                                                                                                          | Setting                                                                                                                                                                       | Country of Origin                                                                                                                                                            | Study Aims                               | Type of NDDs                                                                      | Reported Prevalence                                                                                              | Statistical Methods and Risk factors                                                                                                                                                                                                                                                              | Article's conclusion/ Recommendations                         | Author's conclusion and Reviewer's comments                                                                                                                                                                                                                                                                                                                                      |
|-----------------------------------------------------------------------------------------------------------------------------------------------------------------------------------------------------------------------------------------------|-----------------------------------------------------------------------------------------------------------------------------------------------------------------------------------------------------------------------------------------------------------------------------------------------------|-------------------------------------------------------------------------------------------------------------------------------------------------------------------------------|------------------------------------------------------------------------------------------------------------------------------------------------------------------------------|------------------------------------------|-----------------------------------------------------------------------------------|------------------------------------------------------------------------------------------------------------------|---------------------------------------------------------------------------------------------------------------------------------------------------------------------------------------------------------------------------------------------------------------------------------------------------|---------------------------------------------------------------|----------------------------------------------------------------------------------------------------------------------------------------------------------------------------------------------------------------------------------------------------------------------------------------------------------------------------------------------------------------------------------|
| <p><b>Authors:</b><br/><i>Authors et al. [ref]</i></p> <p><b>Year of Publication:</b><br/><i>Example: 2005</i></p> <p><b>Study design:</b><br/><i>Example: Cross-sectional study</i></p> <p><b>Country:</b><br/><i>Example: Australia</i></p> | <p><b>Sampling:</b><br/>Details on the number of participants and sampling technique.</p> <p><b>Participants details:</b><br/>Details on the characteristics of participants (age, sex, sociodemographic characteristics, etc.).<br/><i>Example:</i> Participants included children of migrants</p> | <p>Details on the setting of the study.<br/><i>Example:</i> The study was conducted in the City A in Country B, and among participants residing in middle income society.</p> | <p>Details on the country of origin of the participants family.<br/><i>Example:</i> Participants parent(s)'s country of origin is Country X or Mother is from Country Y.</p> | <p>Details on the aims of the study.</p> | <p>Details on the type of NDDs<br/><i>Example:</i> Autistic Spectrum Disorder</p> | <p>Details on the reported prevalence.<br/><i>Example:</i> Prevalence of autism in this population was 8.5%.</p> | <p>Details on the statistical approach used in the study.<br/><i>Example:</i> Regression analysis was used to predict factor Z.</p> <p><b>Risk factors:</b><br/>Details on the potential risk factor of disease A.<br/><i>Example:</i> Variable X was a predictor or risk factor of disease X</p> | <p>Details on the Article's conclusion or Recommendations</p> | <p>Details on the <b>Author's conclusions.</b></p> <p><b>Reviewer's comments:</b><br/>Review comments after evaluation of a publication, and brief explanation on its relation to the key research question of the systematic review.</p> <p><b>Assessment of methodological quality:</b><br/>This study has clearly met X/Y (x.x%) criteria in the critical appraisal tool.</p> |
| <p><b>Notes:</b> Explanation of certain concepts to provide clarity on the interpretation. <i>Example:</i> A, B, X and Y are the exemplar used for clarity.</p>                                                                               |                                                                                                                                                                                                                                                                                                     |                                                                                                                                                                               |                                                                                                                                                                              |                                          |                                                                                   |                                                                                                                  |                                                                                                                                                                                                                                                                                                   |                                                               |                                                                                                                                                                                                                                                                                                                                                                                  |
